# Supplementary material for: Newborn Screening and Treatment of Phenylketonuria: Projected Health Outcomes and Cost-Effectiveness
Source: MDPI journal article supplement (doi:10.3390/children8050381), 2021-05-12
Supplement: s1 [file s1]

Supplementary Materials

Newborn Screening and Treatment of Phenylketonuria: Projected Health Outcomes and Cost-Effectiveness

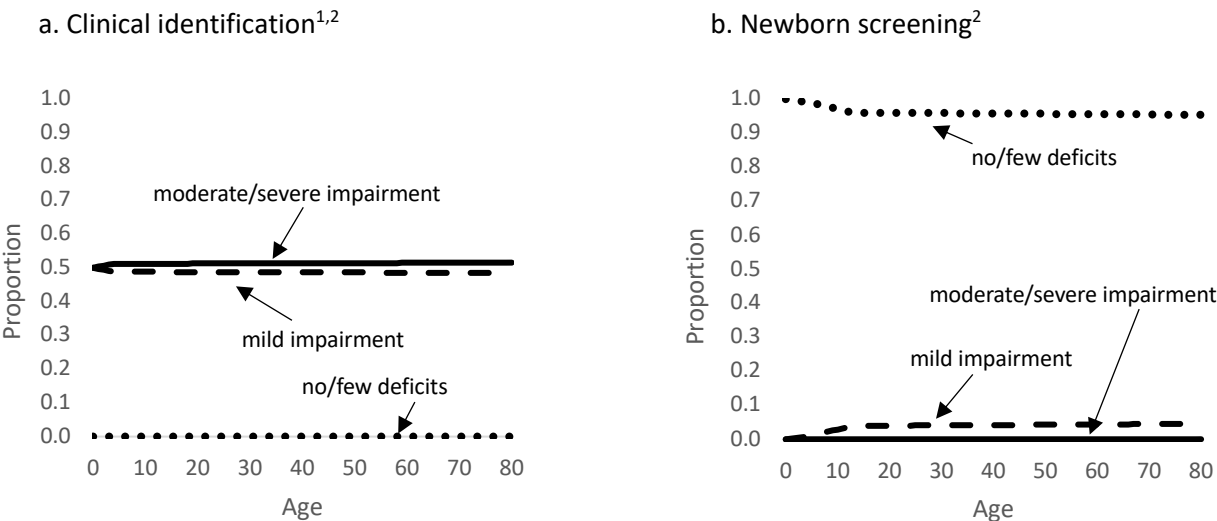

**Figure S1.** Proportion of Hypothetical Cohort of Individuals with PKU by Health State and Age - diet treatment only (no medication), full adherence

<sup>1</sup> Individuals with PKU that are identified through clinical identification start with mild or moderate/severe impairment. <sup>2</sup> These figures only reflect the proportion of individuals alive at that age and does not include those that have died.

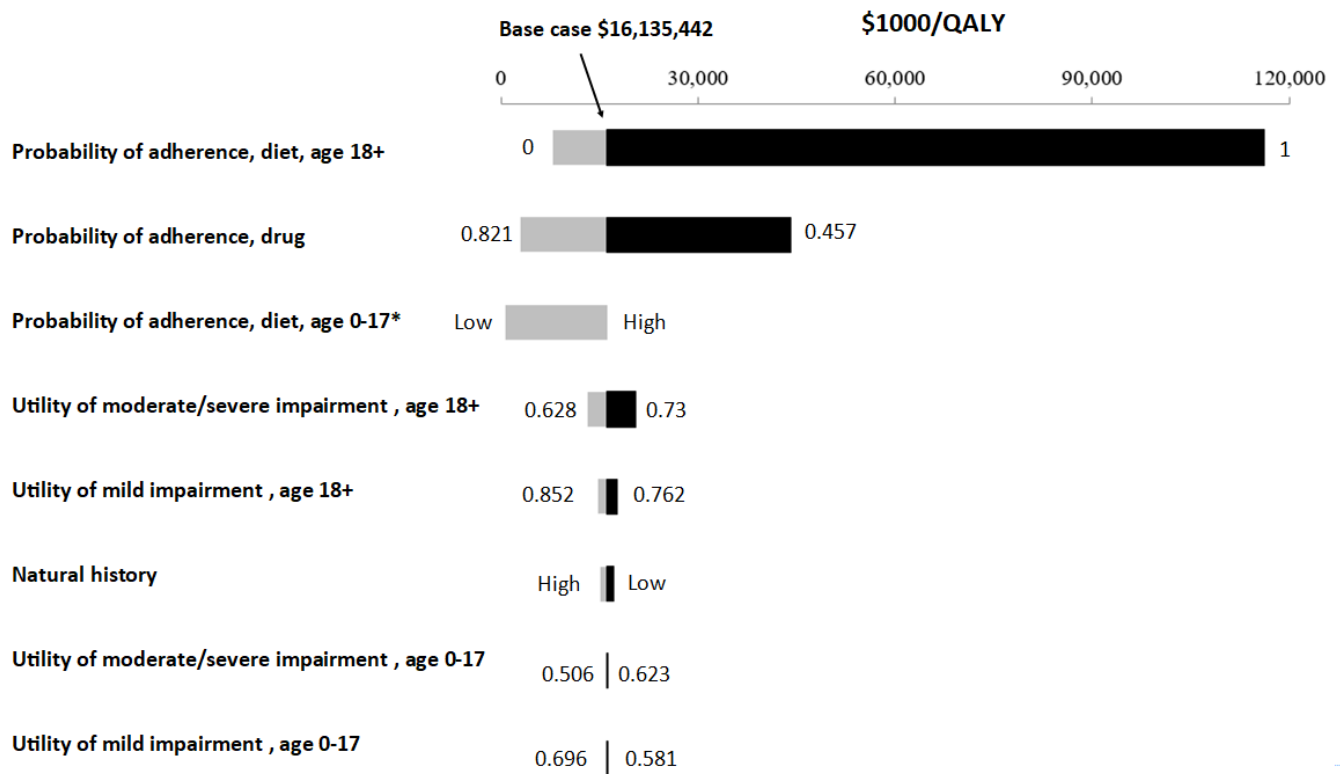

**Figure S2.** Sensitivity analysis results for NBS/diet with medication when compared with NBS/diet

\*When using all upper bound values, the ICER is \$13,592,983/QALYs, with cost of \$65,534 and 0.0048 QALYs per 1000 newborns.

**Table S1** Epidemiology inputs

|                                                                            | Base-case | Range for sensitivity analysis | Data source                                                                                                                                                                                                                                                                         |
|----------------------------------------------------------------------------|-----------|--------------------------------|-------------------------------------------------------------------------------------------------------------------------------------------------------------------------------------------------------------------------------------------------------------------------------------|
| <b>Newborn screening</b>                                                   |           |                                |                                                                                                                                                                                                                                                                                     |
| Probability false negative screen                                          | 0         | --                             | [1, 2]                                                                                                                                                                                                                                                                              |
| Probability positive screen                                                | 0.0002064 | 0.0001308- 0.0003097           | [3]; range: 95% confidence intervals estimated assuming a binomial distribution                                                                                                                                                                                                     |
| Probability positive screen, confirmatory testing  positive initial screen | 0.4782609 | 0.2681962 - 0.694122           | [3]; range: 95% confidence intervals estimated assuming a binomial distribution                                                                                                                                                                                                     |
| Probability PKU  positive confirmatory test                                | 0.5454545 | 0.2337936 - 0.8325119          | [3]; range: 95% confidence intervals estimated assuming a binomial distribution                                                                                                                                                                                                     |
| <b>Probability phe level 360-600 PKU</b>                                   | 0.3770197 | 0.3366195 - 0.418732           | [4]; range: 95% confidence intervals estimated assuming a binomial distribution                                                                                                                                                                                                     |
| <b>Transition probabilities, natural history</b>                           |           |                                |                                                                                                                                                                                                                                                                                     |
| No deficits to mild deficits                                               |           |                                |                                                                                                                                                                                                                                                                                     |
| Age 0 to 3                                                                 | 0.2       | 0.18 - 0.22                    | Estimated from Smith et al.,1974 [5] and Koch et al.,1999 [6] and modified based on expert opinion <sup>1</sup> ; range calculated as plus/minus 10%                                                                                                                                |
| Age 4 to 12                                                                | 0.36      | 0.324 - 0.396                  |                                                                                                                                                                                                                                                                                     |
| Age 13 and above                                                           | 0.01      | 0.009 - 0.011                  |                                                                                                                                                                                                                                                                                     |
| Mild deficits to moderate deficits                                         |           |                                |                                                                                                                                                                                                                                                                                     |
| Age 0 to 3                                                                 | 0.59      | 0.531 - 0.649                  |                                                                                                                                                                                                                                                                                     |
| Age 4 and above                                                            | 0.0098    | 0.00882 - 0.01078              |                                                                                                                                                                                                                                                                                     |
| Moderate deficits to moderate deficits                                     | 1         | --                             |                                                                                                                                                                                                                                                                                     |
| <b>Treatment<sup>2</sup></b>                                               |           |                                |                                                                                                                                                                                                                                                                                     |
| Probability of responding to medication   phe level 360-600, NBS           | 0.81      | 0.79 - 0.83                    | [4]; range: [4]                                                                                                                                                                                                                                                                     |
| Probability of responding to medication   phe level > 600, NBS/CI          | 0.315     | 0.07 - 0.6                     | [4]; range: [4]                                                                                                                                                                                                                                                                     |
| Treatment effect – Diet treatment                                          | 0.99      | --                             | Assumed based on Markov trace; Assume Treatment effect is consistent, and adherence is what variates<br>Assumed; Individuals with PKU with no medication effect are already ruled out by the probability of unresponsive to medication treatment (treated with diet treatment only) |
| Treatment effect - Medication                                              | 1         | --                             |                                                                                                                                                                                                                                                                                     |
| <b>Adherence rate<sup>2</sup></b>                                          |           |                                |                                                                                                                                                                                                                                                                                     |
| Diet treatment                                                             |           |                                |                                                                                                                                                                                                                                                                                     |
| Age 0 to 3                                                                 | 0.88      | 0 - 1                          | [7]; range: assumed                                                                                                                                                                                                                                                                 |
| Age 4 to 12                                                                | 0.74      | 0 - 1                          |                                                                                                                                                                                                                                                                                     |
| Age 13 to 17                                                               | 0.5       | 0 - 1                          |                                                                                                                                                                                                                                                                                     |
| Age 18 and over                                                            | 0.375     | 0 - 1                          |                                                                                                                                                                                                                                                                                     |
| Medication                                                                 | 0.6552    | 0.4567 - 0.8201                | [8]; range: 95% confidence intervals estimated assuming a binomial distribution                                                                                                                                                                                                     |

<sup>1</sup>From Smith et al.,1974 [5]: If untreated, individuals with PKU reach IQ<85/Stage III/moderate/severe by age 3; From Koch et al.,1999 [6]: probability of transferring from Stage II to Stage III: 0.0098459 (1 year probability) (0.13793 -15 year probability); Expert opinion: (1) For untreated (clinical identification): have at least 1% in mild, (2) For early treated: have 50%,50% in no/few deficit and mild respectively by age 10; All values were adjusted to incorporate mortality rate from life table [9].

<sup>2</sup>In the model, a function for adherence rate and treatment effect combined was set up in model:  $(1 - (\text{adherence rate} * \text{treatment effect}))$ . For diet treatment combined with medication, the value of the function for diet treatment and medication were compared and the higher value was used.

**Table S2** Costs

|                                                             | Base-case        | Range for sensitivity analysis | Data source                                        |
|-------------------------------------------------------------|------------------|--------------------------------|----------------------------------------------------|
| <b>Newborn screening and follow-up confirmatory testing</b> |                  |                                |                                                    |
| Screening test                                              | 4.87             | 1.31 - 14.00                   | [10]                                               |
| Confirmatory testing                                        | 114.48           | --                             | <sup>1</sup>                                       |
| <b>Interventions</b>                                        |                  |                                |                                                    |
| Diet treatment <sup>2</sup>                                 | 2,696 - 5,100    | --                             | [11]                                               |
| Medication <sup>3</sup>                                     | 15,142 - 171,713 | --                             | [12-15]                                            |
| <b>Laboratory and developmental testing</b>                 |                  |                                |                                                    |
| Laboratory testing, PKU                                     |                  |                                |                                                    |
| Age 0 to 1                                                  | 3870.36          | --                             | Cost:[16]; frequency: [17] <sup>4</sup>            |
| Age 2 to 17                                                 | 1290.12          | --                             |                                                    |
| Age 18 and above                                            | 595.44           | --                             |                                                    |
| Laboratory testing, hyperphe                                |                  |                                |                                                    |
| Age 0 to 1                                                  | 248.10           | --                             |                                                    |
| Age 2 to 4                                                  | 198.48           | --                             |                                                    |
| Age 5 and above                                             | 49.62            | --                             |                                                    |
| Developmental testing                                       | 161.40           | --                             | Cost: [18]; frequency: expert opinion <sup>5</sup> |
| <b>Provider visits</b>                                      |                  |                                |                                                    |
| Dietician                                                   |                  |                                |                                                    |
| Age 0 to 17                                                 | 88.47            | 0 - 227.50                     | [11, 18] <sup>6</sup>                              |
| Age 18 and above                                            | 499.24           | 6.32 - 1390.29                 |                                                    |
| Geneticist                                                  |                  |                                |                                                    |
| Age 0 to 17                                                 | 13.22            | 0 - 26.45                      | [11, 19] ; expert opinion <sup>7</sup>             |
| Age 18 and above                                            | 19.84            | 6.62 - 33.06                   |                                                    |
| Metabolic specialists, PKU                                  |                  |                                |                                                    |
| Age 0 to 17                                                 | 194.34           | 168.43 - 207.30                | [11, 18] <sup>8</sup>                              |
| Age 18 and above                                            | 194.34           | 142.52 - 259.12                |                                                    |
| Metabolic specialists, hyperphe                             |                  |                                |                                                    |
| Age 0 to 2                                                  | 129.56           | --                             | [18], expert opinion <sup>8</sup>                  |
| Age 3 and above                                             | 64.78            | --                             |                                                    |
| Primary care provider, PKU                                  |                  |                                |                                                    |
| Age 0 to 17                                                 | 69.09            | 37.69 - 100.49                 | [11, 18] <sup>9</sup>                              |
| Age 18 and above                                            | 113.05           | 75.37 - 150.73                 |                                                    |
| Primary care provider, hyperphe                             |                  |                                |                                                    |
| Age 0 to 2                                                  | 62.81            | --                             | [18], expert opinion <sup>9</sup>                  |
| Age 3 and above                                             | 31.40            | --                             |                                                    |

|                                                     |        |               |                        |
|-----------------------------------------------------|--------|---------------|------------------------|
| <b>Visit time</b>                                   |        |               |                        |
| Dietician                                           |        |               |                        |
| Age 0 to 17                                         | 0.1    | 0 - 0.2       | [11]                   |
| Age 18 and above                                    | 2.8    | 1.5 - 5       |                        |
| Geneticist                                          |        |               |                        |
| Age 0 to 17                                         | 0.3    | 0 - 0.9       |                        |
| Age 18 and above                                    | 0.8    | 0.4 - 1.7     |                        |
| Metabolic specialists, PKU                          |        |               |                        |
| Age 0 to 17                                         | 5.9    | 4.6 - 6.9     |                        |
| Age 18 and above                                    | 6      | 4.7 - 7.3     |                        |
| Metabolic specialists, hyperphe                     |        |               |                        |
| Age 0 to 2                                          | 5.9    | --            |                        |
| Age 3 and above                                     | 6.0    | --            |                        |
| Primary care provider, PKU                          |        |               |                        |
| Age 0 to 17                                         | 1.3    | 1.1 - 1.6     |                        |
| Age 18 and above                                    | 1.2    | 1 - 1.4       |                        |
| Primary care provider, hyperphe                     |        |               |                        |
| Age 0 to 2                                          | 1.3    | --            |                        |
| Age 3 and above                                     | 1.2    | --            |                        |
| <b>Food and food preparation time cost</b>          |        |               |                        |
| Low protein food, out of pocket                     |        |               |                        |
| Age 0 to 17                                         | 1,166  | 703 - 1,695   | [11]                   |
| Age 18 and above                                    | 386    | 128 - 705     |                        |
| Low protein food, retail                            |        |               |                        |
| Age 0 to 17                                         | 1,238  | 730 - 1,792   |                        |
| Age 18 and above                                    | 151    | 20 - 358      |                        |
| Medical formula <sup>10</sup> , out of pocket       |        |               |                        |
| Age 0 to 17                                         | 0      | --            |                        |
| Age 18 and above                                    | 114    | 0 - 344       |                        |
| Medical formula <sup>10</sup> , retail              |        |               |                        |
| Age 0 to 17                                         | 2,696  | 1,750 - 3,680 |                        |
| Age 18 and above                                    | 4,205  | 2,896 - 5,603 |                        |
| Time cost, food preparation                         |        |               |                        |
| Age 0 to 17                                         | 5,709  | 4,085 - 7,472 |                        |
| Age 18 and above                                    | 6,500  | 4,079 - 9,507 |                        |
| <b>Special education cost</b>                       |        |               |                        |
| Tutoring, mild impairment                           | 1,507  | --            | [20, 21] <sup>11</sup> |
| Special education, age 5 to 17, moderate impairment | 10,517 | --            | [22, 23]               |
| <b>Average hourly wage</b>                          | 26.31  | --            | [20]                   |

<sup>1</sup> Personal communication with the Michigan Department of Health and Human Services (MDHHS)

<sup>2</sup> Depending on age, includes low protein food and medical formula, see Food and food preparation time cost item below for more detail.

<sup>3</sup> Sapropterin, depending on age, see Table S1.3 for detail.

<sup>4</sup> Tests include amino acids (CPT 82131), tyrosine (CPT 84510), and Phe (CPT 84030). Testing frequencies for those with PKU were: age 0-1= 78/yr; age 2-17= 26/yr; age 18+=12/year. Testing frequencies for those with hyperphe were: age 0-1= 5/yr; age 2-17= 4/yr; age 18+=1/year.

<sup>5</sup> Annual average assuming tests are conducted every 3 years. Tests included neurobehavioral status exam (CPT 96116), neuropsychological testing (CPT 96118), and developmental testing, extended (CPT 96111)

<sup>6</sup> CPT 97802 and 97803. Frequency of visits was 1.4/yr for children and 7.9/yr for adults.

<sup>7</sup> CPT 96040. Frequency of visits was 0.2/yr for children and 0.3/yr for adults.

<sup>8</sup> CPT 99213. Frequency of visits for those with PKU was 1.5/yr for children and adults. Frequency of visits for those with hyperphe was 1/yr for children 0-2 yr and 0.5/yr for individuals 3+ yr

<sup>9</sup> CPT 99215. Frequency of visits for those with PKU was 1.1/yr for children and 1.8/yr for adults. Frequency of visits for those with hyperphe was 1/yr for children 0-2 yr and 0.5/yr for individuals 3+ yr

<sup>10</sup> Includes amino acid mixture supplementation.

<sup>11</sup> 2 hours per week of tutoring

**Table S3** Quality of life adjustments

| PKU Health State                        | Utility Weight |                                | Data source |
|-----------------------------------------|----------------|--------------------------------|-------------|
|                                         | Base-case      | Range for sensitivity analysis |             |
| <b>Community sample</b>                 |                |                                |             |
| Moderate/severe                         |                |                                |             |
| Age 0 -17                               | 0.564          | 0.506 - 0.623                  |             |
| Age 18+                                 | 0.679          | 0.628 - 0.730                  |             |
| Mild                                    |                |                                | [24]        |
| Age 0-17                                | 0.639          | 0.581 - 0.696                  |             |
| Age 18+                                 | 0.808          | 0.762 - 0.852                  |             |
| <b>Experienced PKU sample</b>           |                |                                |             |
| Moderate/severe                         |                |                                |             |
| Age 0 -17                               | 0.569          | 0.39 - 0.739                   |             |
| Age 18+                                 | 0.812          | 0.737 - 0.878                  |             |
| Mild                                    |                |                                | [24]        |
| Age 0-17                                | 0.622          | 0.441 - 0.792                  |             |
| Age 18+                                 | 0.916          | 0.857 - 0.965                  |             |
| <b>Caregiver disutility<sup>1</sup></b> |                |                                |             |
| Moderate/severe                         | 0.120          | 0.079-0.160                    |             |
| Mild                                    | 0.110          | 0.072-0.148                    | [24]        |

<sup>1</sup> Caregiver disutility are assumed to be 0 for the health state “No/few deficits”, and 1 for health state “Dead”.

**Table S4** Medication (sapropterin) cost

| Age                                                                                                                                                                                                                                                      | Average wholesale price | Veterans Administration Price |
|----------------------------------------------------------------------------------------------------------------------------------------------------------------------------------------------------------------------------------------------------------|-------------------------|-------------------------------|
| 0                                                                                                                                                                                                                                                        | 15,142                  | 12,246                        |
| 1                                                                                                                                                                                                                                                        | 22,637                  | 18,307                        |
| 2                                                                                                                                                                                                                                                        | 27,939                  | 22,596                        |
| 3                                                                                                                                                                                                                                                        | 32,528                  | 26,307                        |
| 4                                                                                                                                                                                                                                                        | 36,912                  | 29,853                        |
| 5                                                                                                                                                                                                                                                        | 43,132                  | 34,883                        |
| 6                                                                                                                                                                                                                                                        | 48,842                  | 39,501                        |
| 7                                                                                                                                                                                                                                                        | 54,553                  | 44,119                        |
| 8                                                                                                                                                                                                                                                        | 64,444                  | 52,119                        |
| 9                                                                                                                                                                                                                                                        | 73,519                  | 59,458                        |
| 10                                                                                                                                                                                                                                                       | 82,696                  | 66,880                        |
| 11                                                                                                                                                                                                                                                       | 95,951                  | 77,601                        |
| 12                                                                                                                                                                                                                                                       | 105,842                 | 85,600                        |
| 13                                                                                                                                                                                                                                                       | 118,282                 | 95,661                        |
| 14                                                                                                                                                                                                                                                       | 127,969                 | 103,495                       |
| 15                                                                                                                                                                                                                                                       | 136,025                 | 110,010                       |
| 16                                                                                                                                                                                                                                                       | 140,205                 | 113,391                       |
| 17                                                                                                                                                                                                                                                       | 143,876                 | 116,360                       |
| 18                                                                                                                                                                                                                                                       | 149,586                 | 120,978                       |
| 19                                                                                                                                                                                                                                                       | 150,402                 | 121,638                       |
| 20                                                                                                                                                                                                                                                       | 159,885                 | 129,307                       |
| 30                                                                                                                                                                                                                                                       | 170,490                 | 137,883                       |
| 40                                                                                                                                                                                                                                                       | 170,490                 | 137,883                       |
| 50                                                                                                                                                                                                                                                       | 171,713                 | 138,873                       |
| 60                                                                                                                                                                                                                                                       | 171,204                 | 138,461                       |
| 70                                                                                                                                                                                                                                                       | 164,474                 | 133,018                       |
| 80                                                                                                                                                                                                                                                       | 147,037                 | 118,916                       |
| Calculated based on Medication (sapropterin) cost per 100 mg tab, recommended initial dose and maintenance dose per kg from literature, and weight (kg) from the Anthropometric Reference Data for Children and Adults: United States 2007-2010. [12-15] |                         |                               |



**Table S5** Mortality [9]

| Age | Mortality |
|-----|-----------|-----|-----------|-----|-----------|-----|-----------|-----|-----------|
| 0   | 0.005958  | 21  | 0.000793  | 42  | 0.001971  | 63  | 0.010905  | 84  | 0.074866  |
| 1   | 0.000422  | 22  | 0.000856  | 43  | 0.002144  | 64  | 0.011695  | 85  | 0.083543  |
| 2   | 0.000255  | 23  | 0.000894  | 44  | 0.002348  | 65  | 0.012556  | 86  | 0.093322  |
| 3   | 0.000186  | 24  | 0.000913  | 45  | 0.002570  | 66  | 0.013508  | 87  | 0.104041  |
| 4   | 0.000159  | 25  | 0.000928  | 46  | 0.002815  | 67  | 0.014581  | 88  | 0.115743  |
| 5   | 0.000145  | 26  | 0.000947  | 47  | 0.003103  | 68  | 0.015815  | 89  | 0.128461  |
| 6   | 0.000129  | 27  | 0.000970  | 48  | 0.003431  | 69  | 0.017230  | 90  | 0.142215  |
| 7   | 0.000116  | 28  | 0.001000  | 49  | 0.003782  | 70  | 0.018838  | 91  | 0.157012  |
| 8   | 0.000104  | 29  | 0.001035  | 50  | 0.004138  | 71  | 0.020667  | 92  | 0.172842  |
| 9   | 0.000095  | 30  | 0.001073  | 51  | 0.004496  | 72  | 0.022677  | 93  | 0.189673  |
| 10  | 0.000091  | 31  | 0.001112  | 52  | 0.004873  | 73  | 0.024820  | 94  | 0.207455  |
| 11  | 0.000098  | 32  | 0.001149  | 53  | 0.005281  | 74  | 0.027179  | 95  | 0.226114  |
| 12  | 0.000122  | 33  | 0.001184  | 54  | 0.005723  | 75  | 0.029681  | 96  | 0.245553  |
| 13  | 0.000166  | 34  | 0.001221  | 55  | 0.006200  | 76  | 0.032686  | 97  | 0.265656  |
| 14  | 0.000227  | 35  | 0.001269  | 56  | 0.006695  | 77  | 0.036220  | 98  | 0.286286  |
| 15  | 0.000292  | 36  | 0.001331  | 57  | 0.007203  | 78  | 0.040148  | 99  | 0.307291  |
| 16  | 0.000359  | 37  | 0.001407  | 58  | 0.007722  | 79  | 0.044507  | 100 | 1.000000  |
| 17  | 0.000437  | 38  | 0.001494  | 59  | 0.008260  | 80  | 0.049302  |     |           |
| 18  | 0.000525  | 39  | 0.001591  | 60  | 0.008842  | 81  | 0.054486  |     |           |
| 19  | 0.000616  | 40  | 0.001700  | 61  | 0.009481  | 82  | 0.060393  |     |           |
| 20  | 0.000709  | 41  | 0.001826  | 62  | 0.010169  | 83  | 0.067070  |     |           |

**Table S6.** Impact Inventory

| Sector                                                   | Type of Impact<br>(list category within each sector with unit of measure if relevant*) | Included in This Reference Case Analysis from ... perspective? |                                     | Notes on Sources of Evidence                                                                                                       |
|----------------------------------------------------------|----------------------------------------------------------------------------------------|----------------------------------------------------------------|-------------------------------------|------------------------------------------------------------------------------------------------------------------------------------|
|                                                          |                                                                                        | Healthcare Sector                                              | Societal                            |                                                                                                                                    |
| Formal Healthcare sector                                 |                                                                                        |                                                                |                                     |                                                                                                                                    |
| Health                                                   | Health outcomes (effects)                                                              |                                                                |                                     |                                                                                                                                    |
|                                                          | Longevity effects                                                                      | <input type="checkbox"/>                                       | <input type="checkbox"/>            |                                                                                                                                    |
|                                                          | Health-related quality-of-life effects                                                 | <input checked="" type="checkbox"/>                            | <input checked="" type="checkbox"/> | Utility Weight                                                                                                                     |
|                                                          | Other health effects (e.g., adverse events and secondary transmissions of infections)  | <input type="checkbox"/>                                       | <input type="checkbox"/>            |                                                                                                                                    |
|                                                          | Medical costs                                                                          |                                                                |                                     |                                                                                                                                    |
|                                                          | Paid for by third-party payers                                                         | <input checked="" type="checkbox"/>                            | <input checked="" type="checkbox"/> | Newborn screening and follow-up cost; Lab and developmental testing cost; Visit costs; Medical formula cost; Low protein food cost |
|                                                          | Paid for by patients Out-of-pocket                                                     | <input checked="" type="checkbox"/>                            | <input checked="" type="checkbox"/> | Medical formula cost; Low protein food cost                                                                                        |
|                                                          | Future related medical costs (payers and patients)                                     | <input checked="" type="checkbox"/>                            | <input checked="" type="checkbox"/> | Lab and development cost; Visit costs; Medical formula cost; Low protein food                                                      |
|                                                          | Future unrelated medical costs (payers and patients)                                   | <input type="checkbox"/>                                       | <input type="checkbox"/>            |                                                                                                                                    |
| Informal Healthcare sector                               |                                                                                        |                                                                |                                     |                                                                                                                                    |
| Health                                                   | Patient time costs                                                                     | NA                                                             | <input checked="" type="checkbox"/> | Visit time cost (Wage cost)                                                                                                        |
|                                                          | Unpaid caregiver time costs                                                            | NA                                                             | <input checked="" type="checkbox"/> | Visit time cost (Wage cost); Time cost of food preparation                                                                         |
|                                                          | Transportation costs                                                                   | NA                                                             | <input type="checkbox"/>            |                                                                                                                                    |
| Non-healthcare sectors (with examples of possible items) |                                                                                        |                                                                |                                     |                                                                                                                                    |

|                                                                                                         |                                                                       |    |                                     |                                                                                   |
|---------------------------------------------------------------------------------------------------------|-----------------------------------------------------------------------|----|-------------------------------------|-----------------------------------------------------------------------------------|
| Productivity                                                                                            | Labor market earnings lost                                            | NA | <input type="checkbox"/>            | Utility weights included productivity loss                                        |
|                                                                                                         | Cost of unpaid lost productivity due to illness                       | NA | <input type="checkbox"/>            |                                                                                   |
|                                                                                                         | Cost of uncompensated household production                            | NA | <input type="checkbox"/>            |                                                                                   |
| Consumption                                                                                             | Further consumption unrelated to health                               | NA | <input type="checkbox"/>            |                                                                                   |
| Social services                                                                                         | Cost of social services as part of intervention                       | NA | <input type="checkbox"/>            | Not included in the analysis but could be included for moderate/severe impairment |
| Legal/criminal justice                                                                                  | Number of crimes related to intervention                              | NA | <input type="checkbox"/>            | Not relevant to PKU                                                               |
|                                                                                                         | Cost of crimes related to intervention                                | NA | <input type="checkbox"/>            |                                                                                   |
| Education                                                                                               | Impact of intervention on educational achievement of population       | NA | <input checked="" type="checkbox"/> | Special education cost                                                            |
| Housing                                                                                                 | Cost of intervention on home improvements (e.g., removing lead paint) | NA | <input type="checkbox"/>            | Not relevant to PKU                                                               |
| Environment                                                                                             | Production of toxic waste or pollution by intervention                | NA | <input type="checkbox"/>            | Not relevant to PKU                                                               |
| Other (specify)                                                                                         | Other impacts                                                         | NA | <input type="checkbox"/>            |                                                                                   |
| <p>*Categories listed are intended as examples for analysts.<br/> Abbreviation: NA = Not applicable</p> |                                                                       |    |                                     |                                                                                   |

**Table S7.** One-way sensitivity analysis results (ICER: \$/QALYs)

|                                                                     | Low         | High          | Range                |
|---------------------------------------------------------------------|-------------|---------------|----------------------|
| <b>(1) NSB/diet (Base case: \$6,408/QALYs)</b>                      |             |               |                      |
| Probability of positive NBS <sup>1</sup>                            | Cost saving | \$38,028      | Larger than \$38,028 |
| Cost of NBS <sup>2</sup>                                            | Cost saving | \$33,758      | Larger than \$33,758 |
| Probability of true positive NBS <sup>3</sup>                       | Cost saving | \$33,534      | Larger than \$33,534 |
| Probability of having PKU when positive NBS                         | \$267       | \$30,147      | \$29,880             |
| Probability of adherence, diet, age 0 to 17                         | \$4,584     | \$17,064      | \$12,480             |
| Utility of moderate/severe impairment, age 0 to 17                  | \$5,935     | \$6,972       | \$1,036              |
| Utility of moderate/severe impairment, age 18+                      | \$5,941     | \$6,953       | \$1,012              |
| Utility of mild impairment, age 18+                                 | \$6,211     | \$6,627       | \$416                |
| Natural History                                                     | \$6,214     | \$6,600       | \$386                |
| Probability of adherence, diet, age 18+                             | \$6,199     | \$6,527       | \$329                |
| <b>(2) CI/diet with medication (Base case: dominated)</b>           |             |               |                      |
| Probability of adherence, diet, age 0 to 17                         | dominated   | dominated     | \$297,621            |
| Probability of positive NBS                                         | dominated   | dominated     | \$194,901            |
| Probability of true positive NBS                                    | dominated   | dominated     | \$174,595            |
| Cost of NBS <sup>4</sup>                                            | dominated   | dominated     | \$158,854            |
| Probability of responding to medication, Phe level over 600         | dominated   | dominated     | \$130,111            |
| Probability of adherence, drug                                      | dominated   | dominated     | \$110,452            |
| Utility of moderate/severe impairment, age 0 to 17                  | dominated   | dominated     | \$30,922             |
| Probability of having PKU when positive NBS                         | dominated   | dominated     | \$29,985             |
| Utility of moderate/severe impairment, age 18+                      | dominated   | dominated     | \$29,661             |
| Probability of Phe level 360-600 when confirmed PKU                 | dominated   | dominated     | \$16,014             |
| <b>(3) NSB/diet with medication (Base case: \$16,135,442/QALYs)</b> |             |               |                      |
| Probability of adherence, diet, age 18+                             | \$7,870,283 | \$116,199,632 | \$108,329,349        |
| Probability of adherence, drug                                      | \$2,998,427 | \$44,122,066  | \$41,123,638         |

|                                                          |              |              |              |
|----------------------------------------------------------|--------------|--------------|--------------|
| Probability of adherence, diet, age 0 to 17 <sup>5</sup> | \$773,931    | \$13,592,983 | \$12,819,052 |
| Utility of moderate/severe impairment, age 18+           | \$13,263,829 | \$20,594,043 | \$7,330,213  |
| Utility of mild impairment, age 18+                      | \$14,861,066 | \$17,724,449 | \$2,863,383  |
| Natural History                                          | \$15,219,198 | \$17,270,717 | \$2,051,518  |
| Utility of moderate/severe impairment, age 0 to 17       | \$16,098,325 | \$16,173,376 | \$75,051     |
| Utility of mild impairment, age 0 to 17                  | \$16,120,648 | \$16,150,524 | \$29,876     |

<sup>1</sup> NSB/diet was considered cost-saving at the low value assumed in the sensitivity analysis. CI/diet was dominated due to higher costs and lower QALYs. (Value range of variable probability of positive NBS: 0.0001308 to 0.0003097)

<sup>2</sup> NSB/diet was considered cost-saving at the low value assumed in the sensitivity analysis. CI/diet was dominated due to higher costs and lower QALYs. (Value range of cost of NBS: 1.305132216 to 14.00179888)

<sup>3</sup> NSB/diet was considered cost-saving at the low value assumed in the sensitivity analysis. CI/diet was dominated due to higher costs and lower QALYs. (Value range of true positive NBS: 0.2681962 to 0.694122)

<sup>4</sup> When at high value, the ICER was larger than the base-case value but still remain dominated.

<sup>5</sup> When using all high value, the ICER is \$13,592,983/QALYs, with cost of \$65,534 and 0.0048 QALYs per 1000 newborns.

NBS: Newborn screening; CI: Clinical identification; QALY: Quality adjusted life year; ICER: incremental cost effectiveness rate

**Table S8.** Scenario analysis, healthcare sector perspective, cohort size: 1,000 individuals

| Strategies                          | Cost (\$USD) | Incremental cost | QALYs      | Incremental QALYs | ICER (\$/QALY) |
|-------------------------------------|--------------|------------------|------------|-------------------|----------------|
| (1) Excluding low protein food cost |              |                  |            |                   |                |
| CI/diet                             | 4,631        | -                | 30,468.921 | -                 | -              |
| NBS/diet                            | 9,752        | 5,121            | 30,469.255 | 0.334             | 15,339         |
| CI/diet with medication             | 70,164       | 60,412           | 30,468.922 | -0.333            | dominated      |
| NBS/diet with medication            | 75,286       | 65,534           | 30,469.259 | 0.004             | 16,135,836     |
| (2) Including low protein food cost |              |                  |            |                   |                |
| CI/diet                             | 5,359        | -                | 30,468.921 | -                 | -              |
| NBS/diet                            | 10,481       | 5,121            | 30,469.255 | 0.334             | 15,339         |
| CI/diet with medication             | 70,893       | 60,412           | 30,468.922 | -0.333            | dominated      |
| NBS/diet with medication            | 76,014       | 65,534           | 30,469.259 | 0.004             | 16,135,836     |

NBS: Newborn screening; CI: Clinical identification; QALY: Quality adjusted life year; ICER: incremental cost effectiveness ratio

**Table S9.** Scenario analysis, full adherence and alternative adherence, cohort size: 1,000 individuals

| Strategies                                                | Cost (\$USD) | Incremental cost | QALYs      | Incremental QALYs | ICER (\$/QALY) |
|-----------------------------------------------------------|--------------|------------------|------------|-------------------|----------------|
| (1) Full adherence rate                                   |              |                  |            |                   |                |
| CI/diet                                                   | 24,755       | -                | 30,468.948 | -                 | -              |
| NBS/diet                                                  | 27,060       | 2,305            | 30,469.466 | 0.518             | 4,452          |
| CI/diet with medication                                   | 124,753      | 97,693           | 30,468.949 | -0.517            | dominated      |
| NBS/diet with medication                                  | 127,074      | 100,014          | 30,469.472 | 0.006             | 15,559,374     |
| (2) Alternative adherence rate for age group 18 and above |              |                  |            |                   |                |
| Adherence rate = 0.5                                      |              |                  |            |                   |                |
| CI/diet                                                   | 16,791       | -                | 30,468.922 | -                 | -              |
| NBS/diet                                                  | 18,931       | 2,139            | 30,469.258 | 0.336             | 6,367          |
| CI/medication with diet                                   | 82,324       | 63,394           | 30,468.923 | -0.335            | dominated      |
| NBS/medication with diet                                  | 84,463       | 65,532           | 30,469.261 | 0.003             | 25,647,548     |
| Adherence rate = 0.74                                     |              |                  |            |                   |                |
| CI/diet                                                   | 19,594       | -                | 30,468.924 | -                 | -              |
| NBS/diet                                                  | 21,733       | 2,139            | 30,469.264 | 0.340             | -              |
| CI/medication with diet                                   | 85,127       | 63,394           | 30,468.924 | -0.340            | 6,287          |
| NBS/medication with diet                                  | 87,265       | 65,532           | 30,469.265 | 0.001             | dominated      |
| Adherence rate = 0.88                                     |              |                  |            |                   |                |
| CI/diet                                                   | 21,228       | -                | 30,468.925 | -                 | -              |
| NBS/diet                                                  | 23,368       | 2,139            | 30,469.268 | 0.343             | 6,240          |
| CI/medication with diet                                   | 86,761       | 63,394           | 30,468.925 | -0.343            | dominated      |
| NBS/medication with diet                                  | 88,900       | 65,532           | 30,469.268 | 0.001             | 118,072,514    |
| Adherence rate = 1                                        |              |                  |            |                   |                |
| CI/diet                                                   | 22,630       | -                | 30,468.926 | -                 | -              |
| NBS/diet                                                  | 24,769       | 2,139            | 30,469.271 | 0.345             | 6,199          |
| CI/medication with diet                                   | 88,162       | 63,394           | 30,468.926 | -0.345            | dominated      |
| NBS/medication with diet                                  | 90,301       | 65,532           | 30,469.271 | 0.001             | 116,199,632    |

NBS: Newborn screening; CI: Clinical identification; QALY: Quality adjusted life year; ICER: incremental cost effectiveness ratio

**Table S10.** Scenario analysis, experienced individuals with PKU sample utility, cohort size: 1,000 individuals

| Strategies               | Cost (\$USD) | Incremental cost | QALYs      | Incremental QALYs | ICER (\$/QALY) |
|--------------------------|--------------|------------------|------------|-------------------|----------------|
| CI/diet                  | 15,332       | -                | 30,469.029 | -                 | -              |
| NBS/diet                 | 17,471       | 2,139            | 30,469.319 | 0.290             | 7,380          |
| CI/diet with medication  | 80,865       | 63,394           | 30,469.030 | -0.289            | dominated      |
| NBS/diet with medication | 83,003       | 65,532           | 30,469.322 | 0.003             | 25,000,119     |

NBS: Newborn screening; CI: Clinical identification; QALY: Quality adjusted life year; ICER: incremental cost effectiveness ratio



**Table S11.** Scenario analysis, Veterans Administration medication cost, cohort size: 1,000 individuals

| Strategies               | Cost (\$USD) | Incremental cost | QALYs      | Incremental QALYs | ICER (\$/QALY) |
|--------------------------|--------------|------------------|------------|-------------------|----------------|
| CI/diet                  | 15,332       | -                | 30,468.921 | -                 | -              |
| NBS/diet                 | 17,471       | 2,139            | 30,469.255 | 0.334             | 6,408          |
| CI/diet with medication  | 68,331       | 50,860           | 30,468.922 | -0.333            | dominated      |
| NBS/diet with medication | 70,470       | 52,999           | 30,469.259 | 0.004             | 13,049,437     |

NBS: Newborn screening; CI: Clinical identification; QALY: Quality adjusted life year; ICER: incremental cost effectiveness rate

**Table S12.** Scenario analysis, including caregiver disutility, cohort size: 1,000 individuals

| Strategies               | Cost (\$USD) | Incremental cost | QALYs      | Incremental QALYs | ICER (\$/QALY) |
|--------------------------|--------------|------------------|------------|-------------------|----------------|
| CI/diet                  | 15,332       | 0                | 30,470.370 | -                 | -              |
| NBS/diet                 | 17,471       | 2,139            | 30,470.799 | 0.429             | 4,990          |
| CI/diet with medication  | 80,865       | 63,394           | 30,470.372 | -0.428            | dominated      |
| NBS/diet with medication | 83,003       | 65,532           | 30,470.804 | 0.005             | 12,430,733     |

NBS: Newborn screening; CI: Clinical identification; QALY: Quality adjusted life year; ICER: incremental cost effectiveness rate

When caregiver disutility was 0.079 and 0.072 for moderate/severe and mild impairment respectively, the ICER for NBS/diet was \$5,397/QALY, and for NBS/diet with medication \$13,479,669/QALY, while CI/diet with medication remain dominated. When caregiver disutility was 0.160 and 0.148 for moderate/severe and mild impairment respectively, the ICER for NBS/diet was \$4,650/QALY and for NBS/diet with medication \$11,568,691/QALY, while CI/diet with medication remain dominated.

**Table S13.** Scenario analysis, partial reverse IQ for late treated individuals with PKU, cohort size: 1,000 individuals

| Strategies | Cost (\$USD) | Incremental cost | QALYs      | Incremental QALYs | ICER (\$/QALY) |
|------------|--------------|------------------|------------|-------------------|----------------|
| CI/diet    | 13,819       | -                | 30,469.020 | -                 | -              |
| NBS/diet   | 17,471       | 3,652            | 30469.255  | 0.2355            | 15,512         |

NBS: Newborn screening; CI: Clinical identification; QALY: Quality adjusted life year; ICER: incremental cost effectiveness rate

Analysis was done by assuming late treated individuals with PKU had a probability of 0.542 in transferring to a better health state when they were 1 year old (when the symptoms appeared and they were diagnosed and immediately received diet treatment), this assumption was based on data from Koch et al and expert opinion.[6]

## References

1. Pandor, A., et al., *Clinical effectiveness and cost-effectiveness of neonatal screening for inborn errors of metabolism using tandem mass spectrometry: a systematic review*. Health Technol Assess, 2004. **8**(12): p. iii, 1-121.
2. Chace, D.H., et al., *Use of phenylalanine-to-tyrosine ratio determined by tandem mass spectrometry to improve newborn screening for phenylketonuria of early discharge specimens collected in the first 24 hours*. Clin Chem, 1998. **44**(12): p. 2405-9.
3. Michigan Department of Health and Human Services MDHHS, *Michigan Newborn Screening Program Annual Report 2015*. 2017.
4. Fiege, B. and N. Blau, *Assessment of tetrahydrobiopterin (BH4) responsiveness in phenylketonuria*. J Pediatr, 2007. **150**(6): p. 627-30.
5. Smith, I. and O.H. Wolff, *Natural history of phenylketonuria and influence of early treatment*. Lancet, 1974. **2**(7880): p. 540-4.
6. Koch, R., et al., *Long-term beneficial effects of the phenylalanine-restricted diet in late-diagnosed individuals with phenylketonuria*. Mol Genet Metab, 1999. **67**(2): p. 148-55.
7. Jurecki, E.R., et al., *Adherence to clinic recommendations among patients with phenylketonuria in the United States*. Mol Genet Metab, 2017. **120**(3): p. 190-197.
8. Rohr, F., et al., *Adherence to tetrahydrobiopterin therapy in patients with phenylketonuria*. Mol Genet Metab, 2015. **114**(1): p. 25-8.
9. Arias, E., M. Heron, and J. Xu, *United States Life Tables, 2013*. Natl Vital Stat Rep, 2017. **66**(3): p. 1-64.
10. PricewaterhouseCoppers L.L.P. (P.w.C.). *Newborn Screening Programs: An Overview of Costs and Financing*. 2002; Available from: [https://www.marchofdimes.org/chapterassets/files/final\\_pwc\\_nbs\\_report2.pdf](https://www.marchofdimes.org/chapterassets/files/final_pwc_nbs_report2.pdf).
11. Rose, A.M., et al., *The financial and time burden associated with phenylketonuria treatment in the United States*. Molecular Genetics and Metabolism Reports, 2019. **21**: p. 100523.
12. Truven Health Analytics, *Micromedex Solutions RED BOOK*. 2016.
13. Veterans Administration (V.A.). *Pharmaceutical Prices*. 2017 [cited 2017; Available from: <https://www.va.gov/opal/nac/fss/pharmPrices.asp>].
14. Lee, P., et al., *Safety and efficacy of 22 weeks of treatment with sapropterin dihydrochloride in patients with phenylketonuria*. Am J Med Genet A, 2008. **146a**(22): p. 2851-9.
15. Vernon, H.J., et al., *Introduction of sapropterin dihydrochloride as standard of care in patients with phenylketonuria*. Mol Genet Metab, 2010. **100**(3): p. 229-33.
16. Centers for Medicare and Medicaid Services (C.M.S.). *Clinical Laboratory Fee Schedule 2016*. 2016; Available from: <https://www.cms.gov/Medicare/Medicare-Fee-for-Service-Payment/ClinicalLabFeeSched/clinlab.html>.
17. National PKU Alliance (N.P.K.U.A.). *MY PKU Binder*. 2014; Available from: <https://npkua.org/Education/My-PKU-Binder>.
18. Centers for Medicare and Medicaid Services (C.M.S.). *Physician Fee Schedule Search and Healthcare Common Procedure Coding System (HCPCS) code*. 2017; Available from: <https://www.cms.gov/apps/physician-fee-schedule/search/search-criteria.aspx>.
19. Dungan, J.Y., C.; Trivedi, A.; Bamlett Sherman, T.; Shulman, L. *Reimbursement for genetic counseling and related services*. 2017 [cited 2017; Available from: <http://www.ashg.org/genetics/ashg07s/f10110.htm>].
20. United States Department of Labor. *Bureau of Labor Statistics*. 2017 [cited 2017; Available from: <https://www.bls.gov/>].
21. Sylvan learning. *Sylvan learning program*. 2017; Available from: <http://www.sylvanlearning.com/tutoring/how-tutoring-works/what-to-expect/pricing>.
22. National Education Association. *Background of Special Education and the Individuals with Disabilities Education Act (IDEA)*. 2004 [cited 2017; Available from: <http://www.nea.org/home/19029.htm>].

23. American Institutes for Research (A.I.R.). *Center for Special Education Finance (CSEF)*. 2017 [cited 2017; Available from: <https://www.air.org/project/center-special-education-finance-csef>].
24. Simon, N.J., et al., *Health utilities and parental quality of life effects for three rare conditions tested in newborns*. J Patient Rep Outcomes, 2019. **3**(1): p. 4.
